# Supplementary material for: Regulation mechanism of human insulin fibrillation byl-lysine carbon dots: low concentration accelerates but high concentration inhibits the fibrillation process
Source: Royal Society of Chemistry journal article supplement (doi:10.1039/d3cp01083j), 2023-01-01
Supplement: d3cp01083j1.pdf [file d3cp01083j1.pdf]

## Supporting Information

### **Regulation mechanism of human insulin fibrillation by L-lysine Carbon Dots: low concentration accelerates but high concentration inhibits the fibrillation process**

Xing-Yu Liu<sup>a</sup>, Shuai-Chen Du<sup>a</sup>, Feng-Lei Jiang<sup>a</sup>, Peng Jiang<sup>a,d,\*</sup>, Yi Liu<sup>a,b,c,\*</sup>

<sup>a</sup>College of Chemistry and Molecular Sciences & School of Pharmaceutical Sciences,  
Key Laboratory of Combinatorial Biosynthesis and Drug Discovery (MOE), Wuhan  
University, Wuhan 430072, P. R. China

<sup>b</sup>School of Chemistry and Environmental Engineering, Wuhan Polytechnic University,  
Wuhan 430023, P. R. China

<sup>c</sup>State Key Laboratory of Separation Membrane and Membrane Process & Tianjin Key  
Laboratory of Green Chemical Technology and Process Engineering, School of  
Chemistry, Tiangong University, Tianjin 300387, P. R. China

<sup>d</sup>Hubei Jiangxia Laboratory, Wuhan 430023, P. R. China

#### **Corresponding Author**

**Peng Jiang** - E-mail: [jiangpeng@whu.edu.cn](mailto:jiangpeng@whu.edu.cn)

**Yi Liu** - E-mail: [yiliu@whu.edu.cn](mailto:yiliu@whu.edu.cn)

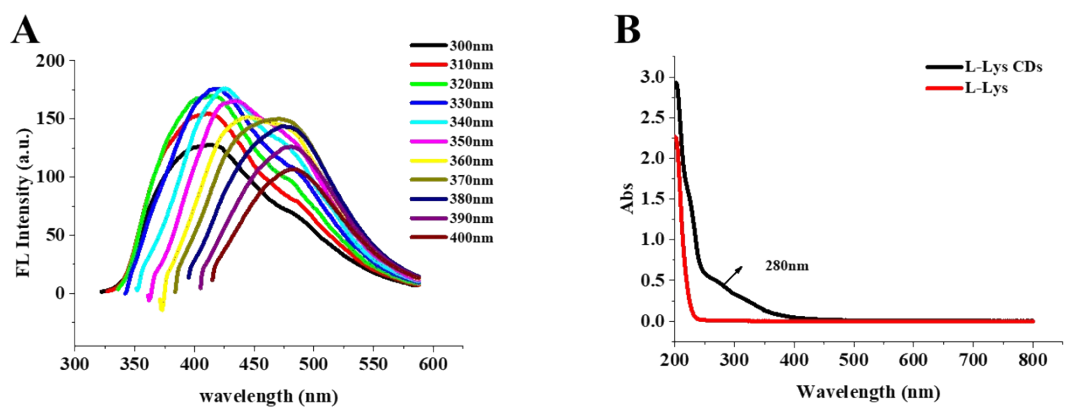

**Figure S1.** (A) PL spectra of L-Lys CDs; (B) Absorption spectra of L-Lys CDs

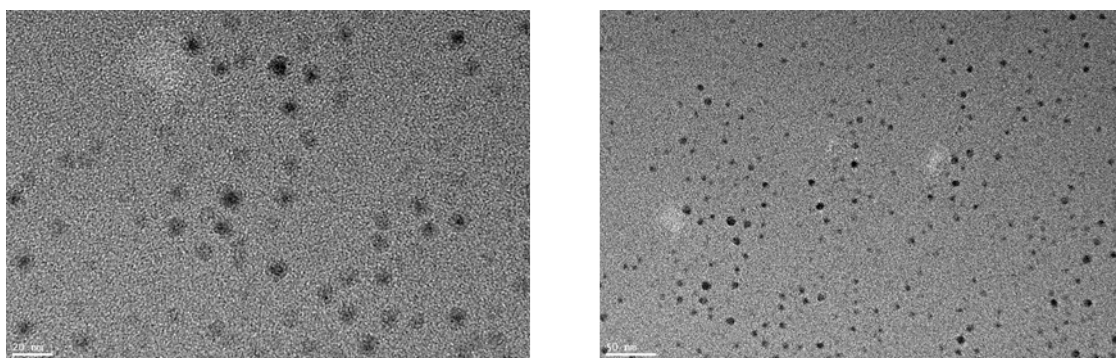

**Figure S2.** TEM images of L-Lys CDs.

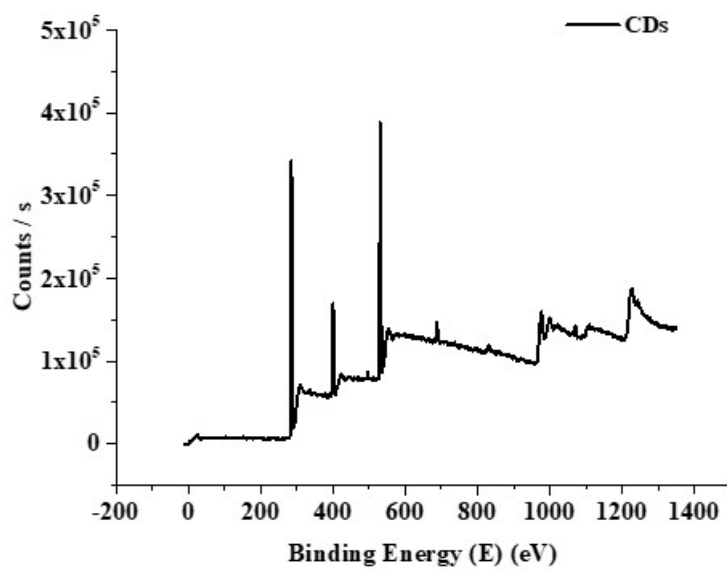

**Figure S3.** XPS spectra of L-Lys CDs.

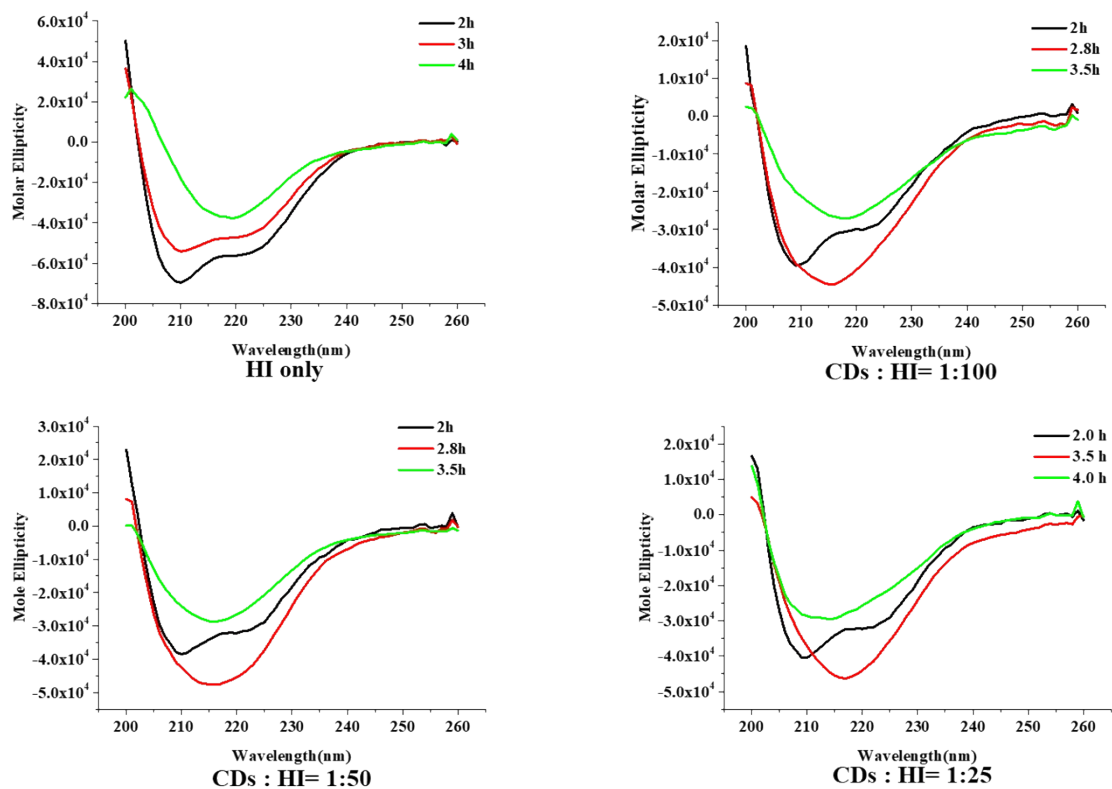

**Figure S4.** CD spectrum of HI at different incubation time periods.

**Table S1.** The value of  $t_0$ ,  $\tau$ ,  $t_{\text{lag}}$  and  $v$  when CDs-to-HI mass concentration ratio is different.

| $y = y_0 + y_1 / (1 + \exp(-(t-t_0)/\tau))$<br>$t_{\text{lag}} = t_0 - 2\tau \quad v = 1/\tau$ | $t_0$ /h | $\tau$ /h | $t_{\text{lag}}$ /h | $v$ /h <sup>-1</sup> |
|------------------------------------------------------------------------------------------------|----------|-----------|---------------------|----------------------|
| HI only                                                                                        | 2.42     | 0.13      | 2.16                | 7.69                 |
| L-Lys CDs: HI=1:100                                                                            | 2.79     | 0.08      | 2.63                | 12.5                 |
| L-Lys CDs: HI=1:50                                                                             | 3.00     | 0.06      | 2.88                | 16.66                |
| L-Lys CDs: HI=1:25                                                                             | 3.31     | 0.11      | 3.07                | 9.09                 |
| L-Lys CDs: HI=1:20                                                                             | 4.78     | 0.12      | 4.54                | 8.33                 |
| L-Lys CDs: HI=1:10                                                                             | 5.93     | 0.17      | 5.59                | 5.88                 |
| L-Lys CDs: HI=1:5                                                                              | 20.01    | 0.18      | 19.65               | 5.55                 |
| L-Lys CDs: HI=1:2                                                                              | 27.02    | 0.19      | 26.64               | 5.26                 |
| L-Lys CDs: HI=1:1                                                                              | 42.42    | 0.21      | 42.00               | 4.76                 |

**Table S2.** Distribution of HI's secondary structures calculated from CD spectrum

|                     |       | $\alpha$ -helix | $\beta$ -sheet | $\beta$ -turn | Unrd  |
|---------------------|-------|-----------------|----------------|---------------|-------|
|                     | HI 2h | 0.661           | 0.025          | 0.116         | 0.231 |
|                     | HI 3h | 0.345           | 0.202          | 0.174         | 0.288 |
|                     | HI 4h | 0.153           | 0.549          | 0.122         | 0.176 |
| L-Lys CDs: HI=1:100 | 2.0 h | 0.624           | 0.033          | 0.121         | 0.222 |
| L-Lys CDs: HI=1:100 | 2.8 h | 0.298           | 0.365          | 0.174         | 0.167 |
| L-Lys CDs: HI=1:100 | 3.5 h | 0.112           | 0.570          | 0.119         | 0.199 |
| L-Lys CDs: HI=1:50  | 2.0 h | 0.645           | 0.016          | 0.168         | 0.171 |
| L-Lys CDs: HI=1:50  | 2.8 h | 0.304           | 0.335          | 0.186         | 0.175 |
| L-Lys CDs: HI=1:50  | 3.5 h | 0.152           | 0.547          | 0.102         | 0.199 |
| L-Lys CDs: HI=1:25  | 2.0 h | 0.651           | 0.025          | 0.116         | 0.157 |
| L-Lys CDs: HI=1:25  | 3.5 h | 0.333           | 0.328          | 0.166         | 0.173 |
| L-Lys CDs: HI=1:25  | 4.0 h | 0.144           | 0.553          | 0.119         | 0.164 |

**Table S3.** The value of  $t_0$ ,  $\tau$ ,  $t_{lag}$  and  $v$  when CDs-to-HI mass concentration ratio was 1:5 with different delay time of adding CDs.

| $y = y_0 + y_1 / (1 + \exp(-(t-t_0)/\tau))$<br>$t_{lag} = t_0 - 2\tau \quad v = 1/\tau$ | $t_0$ /h | $\tau$ /h | $t_{lag}$ /h | $S^2$ | $v$ /h <sup>-1</sup> | $S^2$ |
|-----------------------------------------------------------------------------------------|----------|-----------|--------------|-------|----------------------|-------|
| Control                                                                                 | 2.42     | 0.13      | 2.16         | 0.022 | 7.69                 | 0.122 |
| 0 h delay                                                                               | 20.01    | 0.18      | 19.65        | 0.667 | 5.55                 | 0.208 |
| 1 h delay                                                                               | 10.70    | 0.17      | 10.44        | 0.987 | 5.88                 | 0.529 |
| 2 h delay                                                                               | 2.86     | 0.15      | 2.56         | 0.539 | 6.66                 | 1.03  |

**Table S4.** The value of  $t_0$ ,  $\tau$ ,  $t_{lag}$  and  $v$  when CDs-to-HI mass concentration ratios was 1:50 with different delay time of adding CDs.

| $y = y_0 + y_1 / (1 + \exp(-(t-t_0)/\tau))$<br>$t_{lag} = t_0 - 2\tau \quad v = 1/\tau$ | $t_0$ /h | $\tau$ /h | $t_{lag}$ /h | $S^2$ | $v$ /h <sup>-1</sup> | $S^2$ |
|-----------------------------------------------------------------------------------------|----------|-----------|--------------|-------|----------------------|-------|
| Control                                                                                 | 2.42     | 0.13      | 2.16         | 0.022 | 7.69                 | 0.122 |
| 0 h delay                                                                               | 3.00     | 0.06      | 2.88         | 0.272 | 16.66                | 0.889 |
| 1 h delay                                                                               | 2.66     | 0.07      | 2.59         | 0.453 | 14.28                | 1.56  |
| 2 h delay                                                                               | 2.39     | 0.12      | 2.15         | 0.556 | 8.33                 | 1.14  |

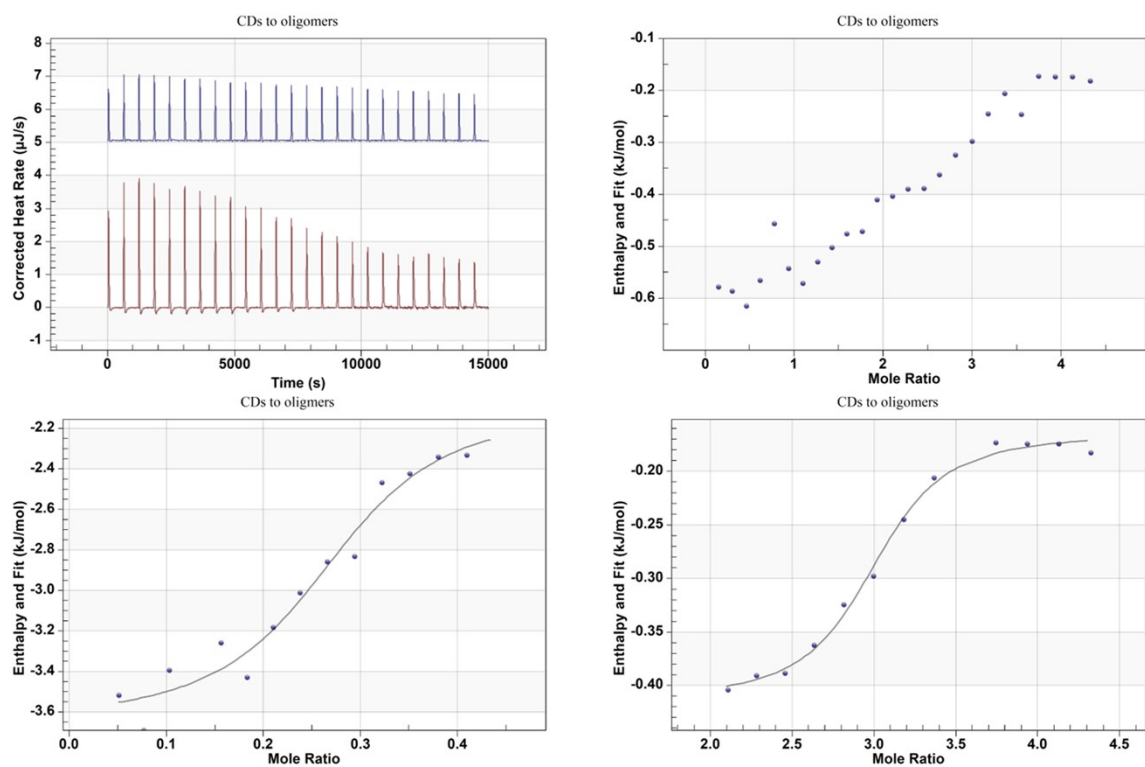

**Figure S5.** ITC process of CDs to HI monomers. Corrected heat rate of background and experiment; Enthalpy heat of overall process; The 1<sup>st</sup> step's enthalpy heat; The 2<sup>nd</sup> step's enthalpy heat. Molar concentration of HI was 0.53 mmol L<sup>-1</sup>, molar concentration of CDs was 1.21 mmol L<sup>-1</sup>. All experiments repeat for three times. The deviations of fitting parameters were shown in Table 1.

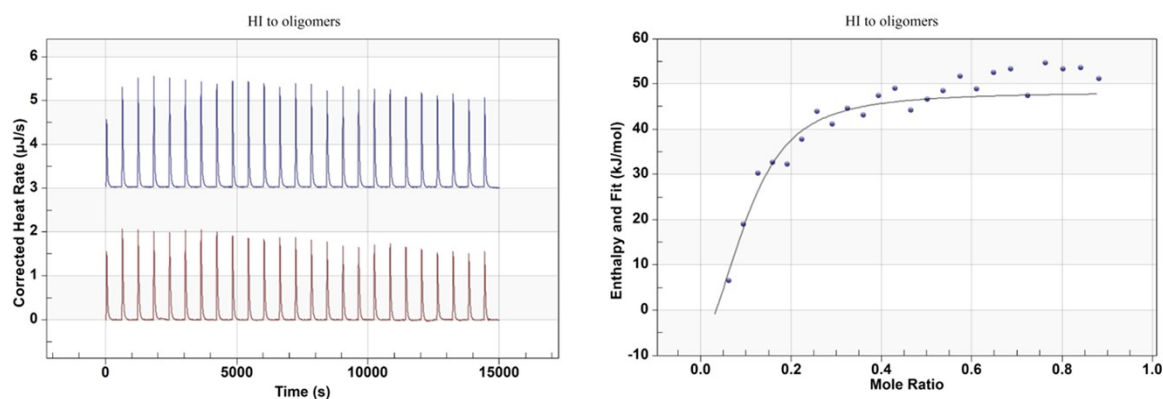

**Figure S6.** ITC process of HI monomers to HI oligomers. Corrected heat rate of background and experiment and Enthalpy heat of overall process. Molar concentration of HI was  $0.53 \text{ mmol L}^{-1}$ , molar concentration of CDs was  $1.21 \text{ mmol L}^{-1}$ . All experiments repeat for three times. The deviations of fitting parameters were shown in Table 1.

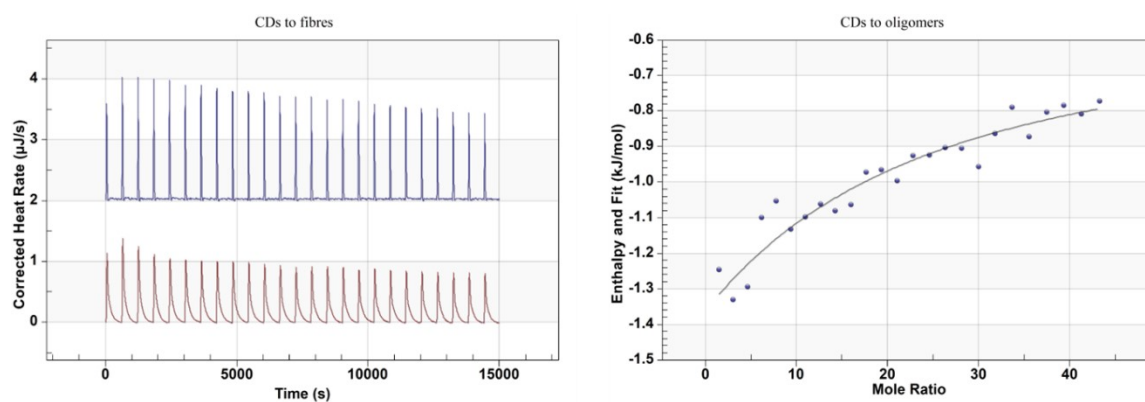

**Figure S7.** ITC process of CDs to HI fibres. Corrected heat rate of background and experiment and Enthalpy heat of overall process. Molar concentration of HI was  $0.53 \text{ mmol L}^{-1}$ , molar concentration of CDs was  $1.21 \text{ mmol L}^{-1}$ . All experiments repeat for three times. The deviations of fitting parameters were shown in Table 1.



**Table S5.** The ratio of combination ( $n$ ) of ITC group (CDs to HI). The concentration of both compounds was  $1 \text{ mg mL}^{-1}$

| CDs to HI    | 1 <sup>st</sup> | 2 <sup>nd</sup> |
|--------------|-----------------|-----------------|
| $n$ (CDs/HI) | $4.12 \pm 0.11$ | $4.35 \pm 0.14$ |

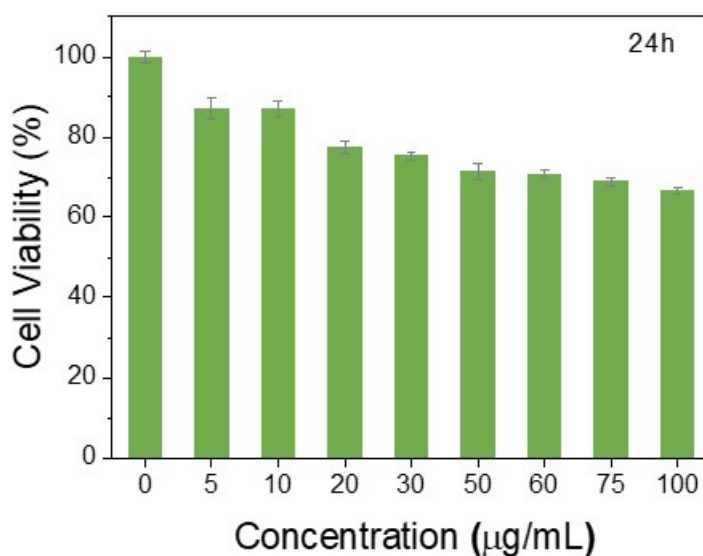

**Figure S8.** Viability of the HeLa cells after 24h incubation with the CDs

**Table S6.** The zeta potential values of CDs and insulin. The pH was same as that of fibrillation process. The concentration of both compounds was  $1 \text{ mg mL}^{-1}$

|                | CDs            | Insulin         |
|----------------|----------------|-----------------|
| Zeta potential | $22.6 \pm 2.7$ | $-31.4 \pm 1.8$ |

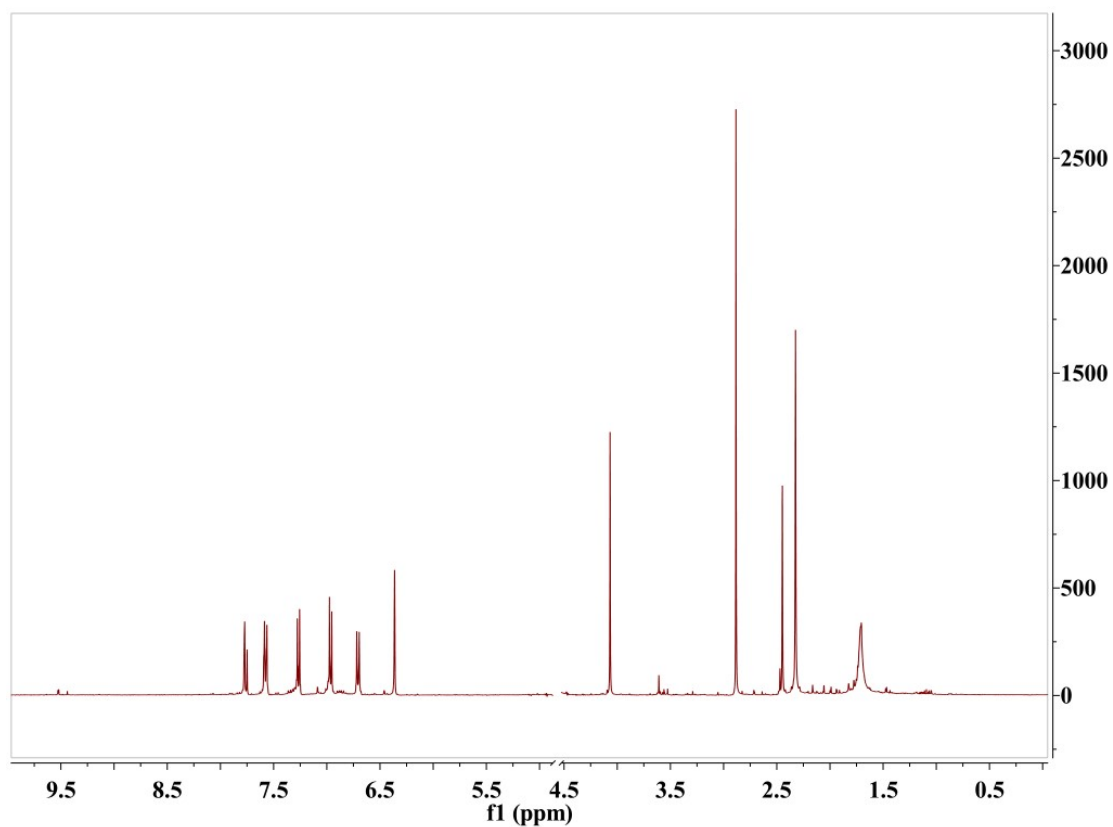

**Figure S9.** <sup>1</sup>H NMR spectrum of L-Lys CDs. 5 mg CDs were dissolved in 0.3 mL D<sub>2</sub>O, the NMR spectrometer was 400 MHz.

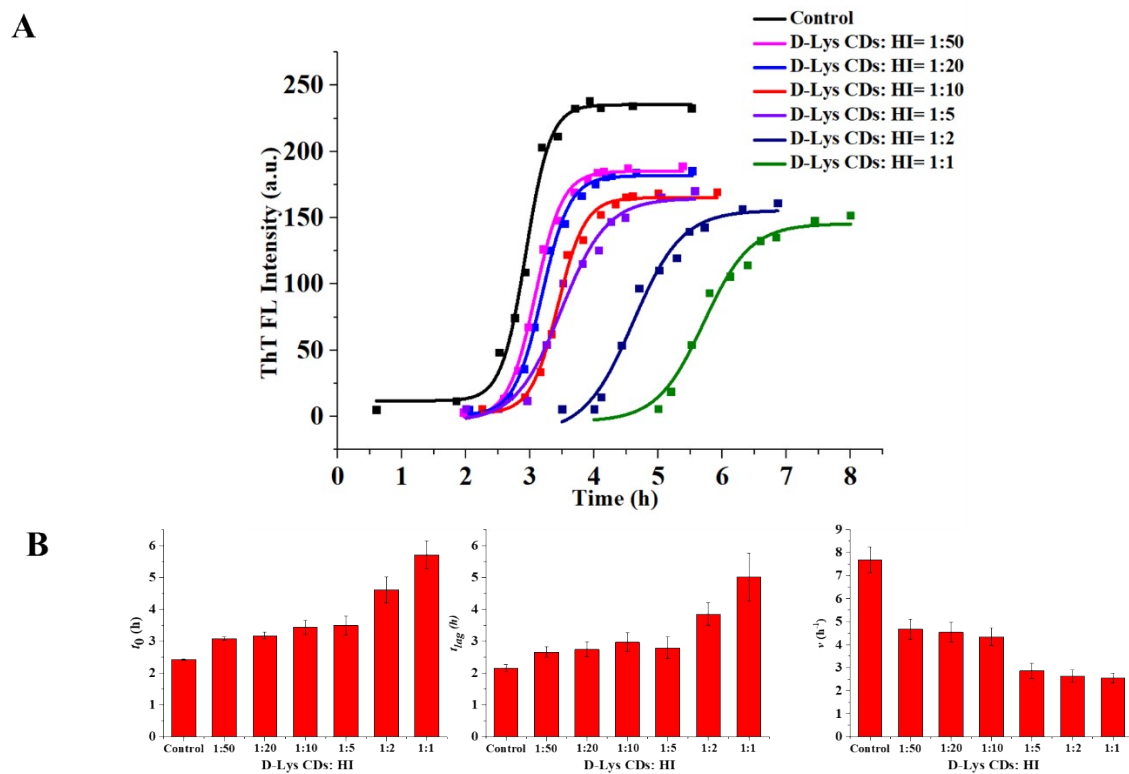

**Figure S10.** Kinetics of insulin fibrillation process. The concentration of HI was  $1 \text{ mg mL}^{-1}$ . The dissolvent of HI was HCl-NaCl (100 mM, pH = 2.0). The change of ThT fluorescence intensity was acquire by the samples of different incubation times (A). The column of  $t_0$ ,  $t_{lag}$  and  $v$  when CDs-to-HI mass concentration ratios of 1:50, 1:20, 1:10, 1:5, 1:2 and 1:1 (B). All experiments repeat for three times. The error bars of fitting parameters were shown in Figure 10B.

**Table S7.** The value of  $t_0$ ,  $\tau$ ,  $t_{\text{lag}}$  and  $v$  when D-Lys CDs-to-HI mass concentration ratio is different.

| $y = y_0 + y_1 / (1 + \exp(-(t-t_0)/\tau))$<br>$t_{\text{lag}} = t_0 - 2\tau \quad v = 1/\tau$ | $t_0$ /h | $\tau$ /h | $t_{\text{lag}}$ /h | $v$ /h <sup>-1</sup> |
|------------------------------------------------------------------------------------------------|----------|-----------|---------------------|----------------------|
| HI only                                                                                        | 2.42     | 0.13      | 2.16                | 7.69                 |
| D-Lys CDs: HI=1:50                                                                             | 3.08     | 0.21      | 2.66                | 4.76                 |
| D-Lys CDs: HI=1:20                                                                             | 3.18     | 0.22      | 2.74                | 4.54                 |
| D-Lys CDs: HI=1:10                                                                             | 3.43     | 0.23      | 2.97                | 4.35                 |
| D-Lys CDs: HI=1:5                                                                              | 3.49     | 0.35      | 2.79                | 2.86                 |
| D-Lys CDs: HI=1:2                                                                              | 4.61     | 0.38      | 3.85                | 2.63                 |
| D-Lys CDs: HI=1:1                                                                              | 5.71     | 0.39      | 5.01                | 2.56                 |
